# Supplementary material for: Quantitative analysis of the tomato nuclear proteome during Phytophthora capsici infection unveils regulators of immunity
Source: PubMed Central journal article supplement (PMC5637918; doi:10.1111/nph.14540), 2017-04-10
Supplement: NPH-215-309-s001.pdf [file NPH-215-309-s001.pdf]

## ***New Phytologist* Supporting Information**

**Article title: Quantitative analyses of the tomato nuclear proteome during *Phytophthora capsici* infection unveils regulators of immunity**

Authors: Andrew J.M. Howden, Remco Stam, Victor Martinez Heredia, Graham B. Motion, Sara ten Have, Kelly Hodge, Tiago M.M.M. Amaro and Edgar Huitema  
Article acceptance date: 07 February 2017

The following Supporting Information is available for this article:

**Table S1** Primers used for generating constructs with stop codon and for insertion into pENTR-D-Topo.

**Fig. S1** Mass spectrometry data analysis pipeline.

**Fig. S2** Successful enrichment of nuclear proteins demonstrated by western blotting with anti-histone H3 antibody and subcellular markers.

**Fig. S3** Plots describing levels of correlation between samples for each treatment and replicate.

**Fig. S4** Assessment of changes in protein levels between treatments.

**Fig. S5** Gene Ontology (GO) term analysis for those proteins changing in abundance 24 hours post-infection.

**Fig. S6** Verification of the expression and stability of EGFP fusion constructs used for confocal microscopy, *P. capsici* infection and PTI assays.

**Fig. S7** ClustalW Alignment of AHL1, AHL5 and AHL9 amino acid sequences.

**Table S1 Primers used for generating constructs with stop codon and for insertion into pENTR-D-Topo.**

| <b>Gene</b>                    | <b>Primer Name</b> | <b>Sequence</b>           |
|--------------------------------|--------------------|---------------------------|
| Solyc01g091370.2.1<br>(AHL1)   | Solyc01g091370-F   | CACCATGGAGTCAAGGGAAGCTAT  |
|                                | Solyc01g091370-R   | TTACTCTCCTTGCAATGATA      |
| Solyc08g008030.2.1<br>(AHL5)   | Solyc08g008030-F   | CACCATGGATGGAAGAGAAGGGATG |
|                                | Solyc08g008030-R   | TCATCCACGTGTCAGGTCAATC    |
| Solyc01g094460.2.1<br>(AHL9)   | Solyc01g094460-F   | CACCATGGATCGAAGGGAAGCTATG |
|                                | Solyc01g094460-R   | TCATCCTCGCATTAAATCAATG    |
| Solyc04g076220.2.1<br>(AHL17a) | Solyc04g076220-F   | CACCATGAAAAGGGAGTATGTACT  |
|                                | Solyc04g076220-R   | TCAGTAAGGCGGTGGTTGTGG     |
| Solyc12g087950.2.1<br>(AHL17b) | Solyc12g087950-F   | CACCATGAAAGAAAAATATATAGA  |
|                                | Solyc12g087950-R   | TTAGTAAGGCAGTAGTTGTCT     |

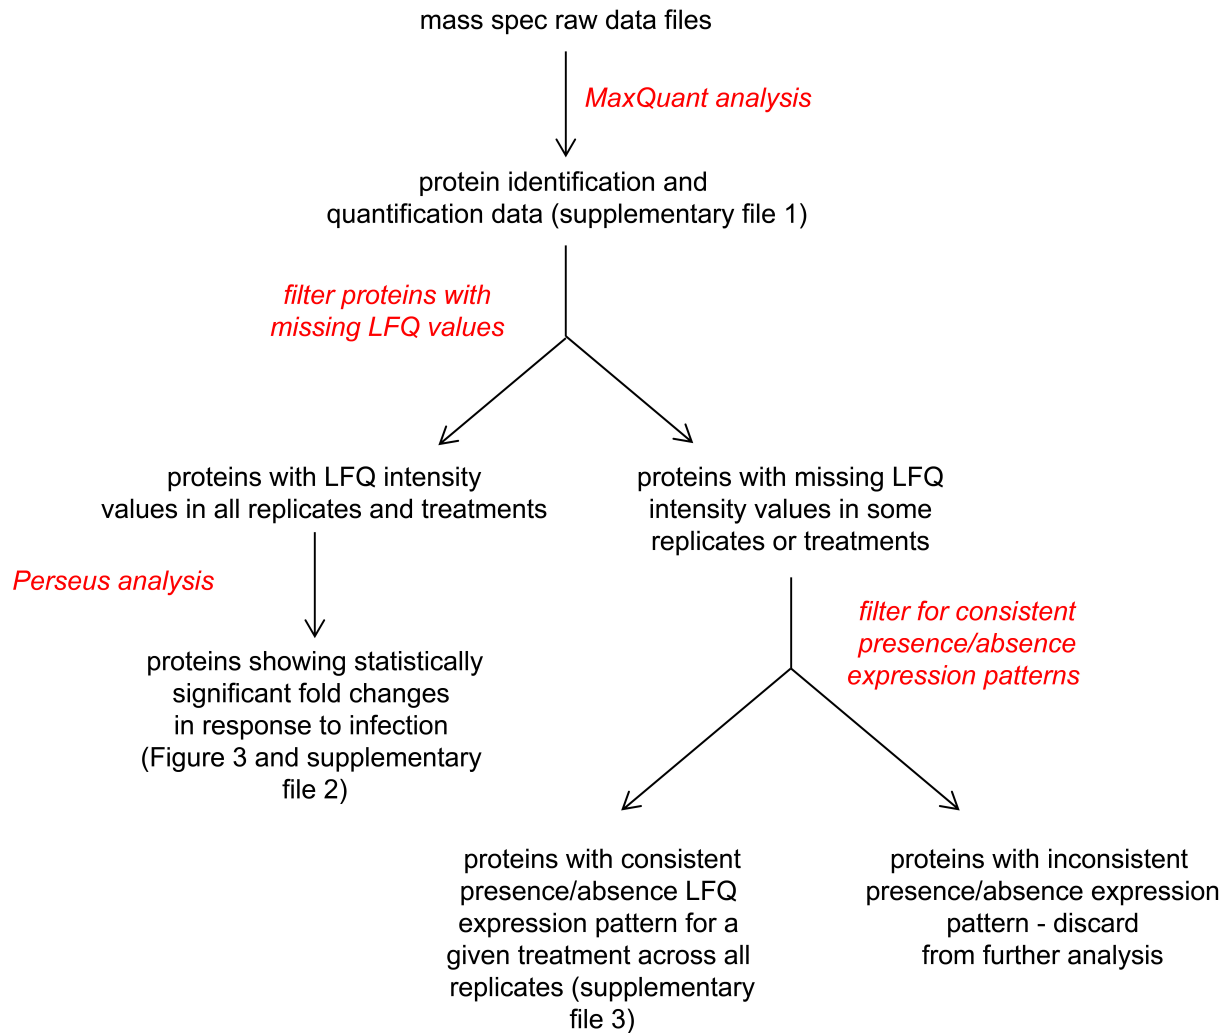

**Fig. S1 Mass spectrometry data analysis pipeline.**

Mass spectrometry data analysis pipeline. Mass spec results files were analysed using MaxQuant software to generate protein identification and label-free quantification data. Those proteins with label free quantification (LFQ) data available in all replicates and treatments were analysed within Perseus using two-sample t-tests and a false discovery threshold of 0.05 to identify those proteins showing significant changes in expression during infection. Those proteins with missing LFQ intensity values were analysed using the R software package to

identify consistent presence/absence expression patterns when comparing infected with non-infected samples.



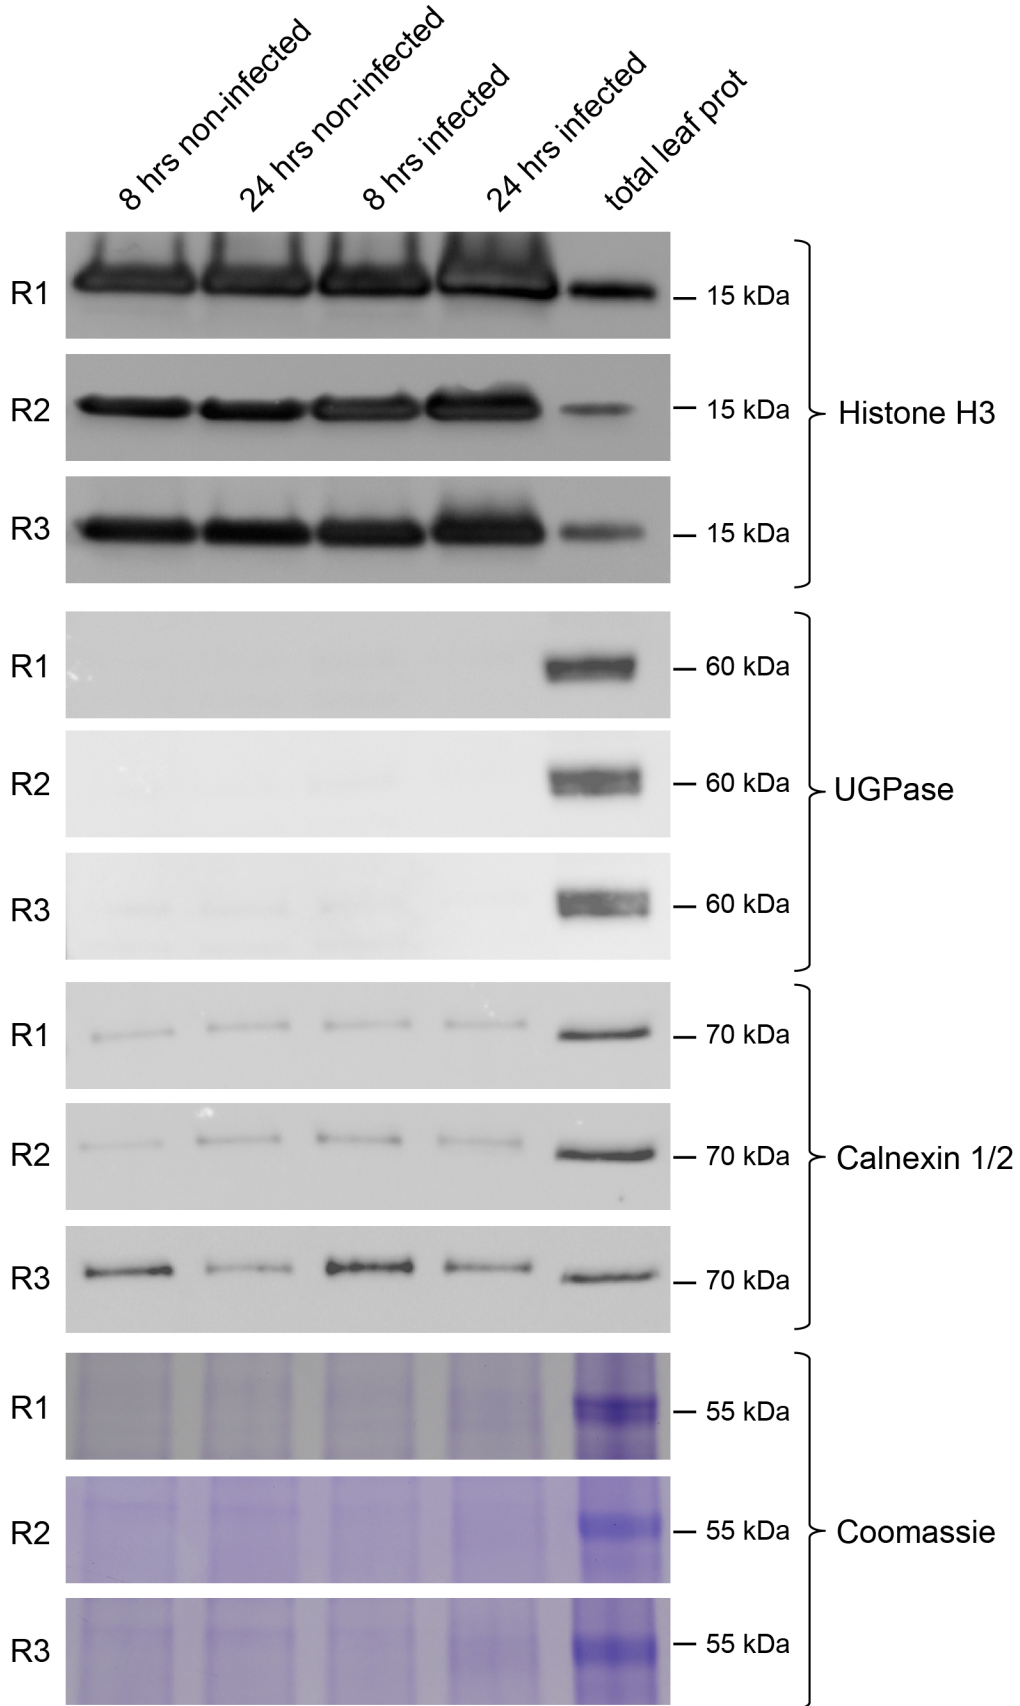

**Fig. S2 Successful enrichment of nuclear proteins demonstrated by western blotting with anti-histone H3 antibody and subcellular markers.**

Protein extracts were generated from enriched nuclei samples and compared to a total protein extract from tomato leaves. Protein concentrations were adjusted for equal loading. Non-nuclear contamination was assessed by probing with anti-UDP-glucose pyrophosphorylase (UGPase) antibody (cytoplasm) and calnexin homolog 1/2 antibody (endoplasmic reticulum). Samples were also run on gels and coomassie stained to assess protein loading and RuBisCO abundance. The figure shows the results from 3 biological replicates (R1, R2 and R3) used for mass spectrometry experiments.

(a)

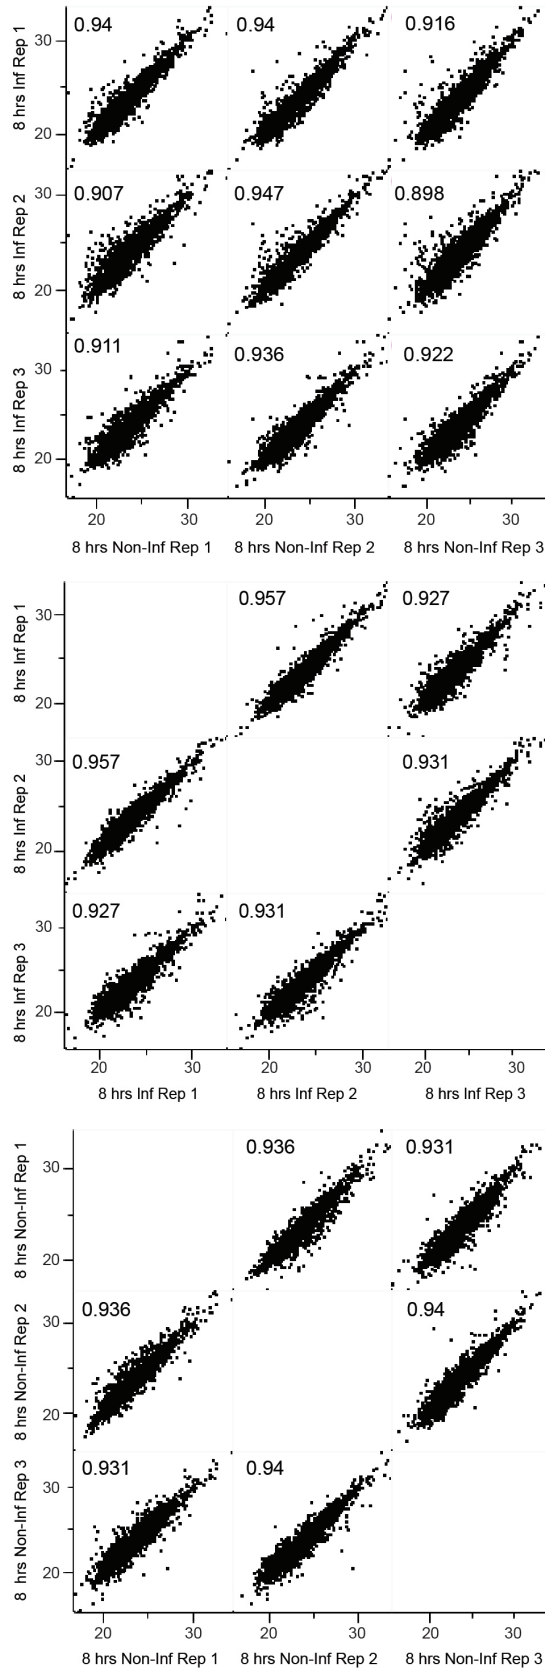

(b)

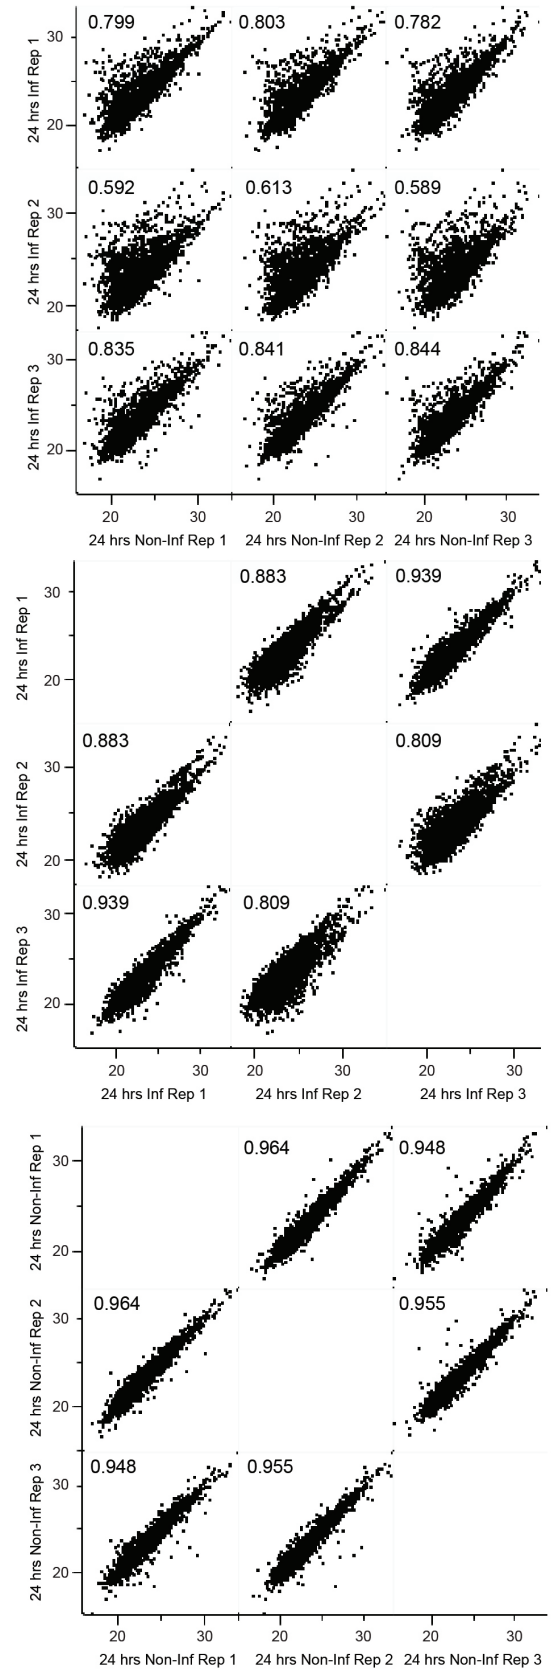

**Fig. S3 Plots describing levels of correlation between samples for each treatment and replicate.**

Pearson correlation values were calculated and are presented at the top left corner of each plot. **(a)** Correlation plots between infected and non-infected samples at the 8 hour time point. **(b)** Correlation plots between samples of infected and non-infected samples at the 24 hour time point.

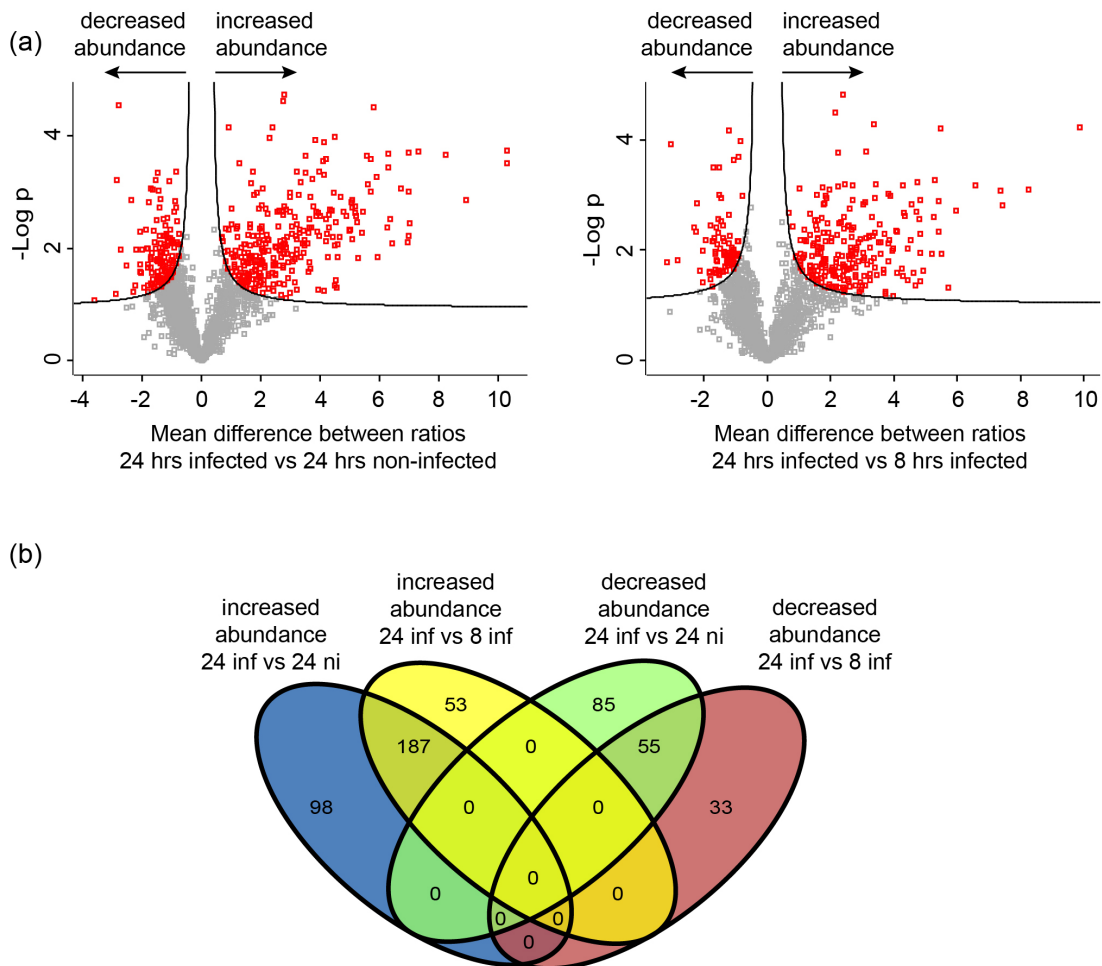

**Fig. S4 Assessment of changes in protein levels between treatments.**

**(A)** Protein expression scatter plots comparing 24 hrs infected with 24 hrs non-infected samples, and 24 hrs infected vs 8 hrs infected samples. **(B)** The venn diagram shows that many proteins changing in abundance 24 hrs post-infection vs 24 hrs non-infected also overlap with those proteins changing 24 hrs post-infection relative to 8 hrs post-infection.

(a)

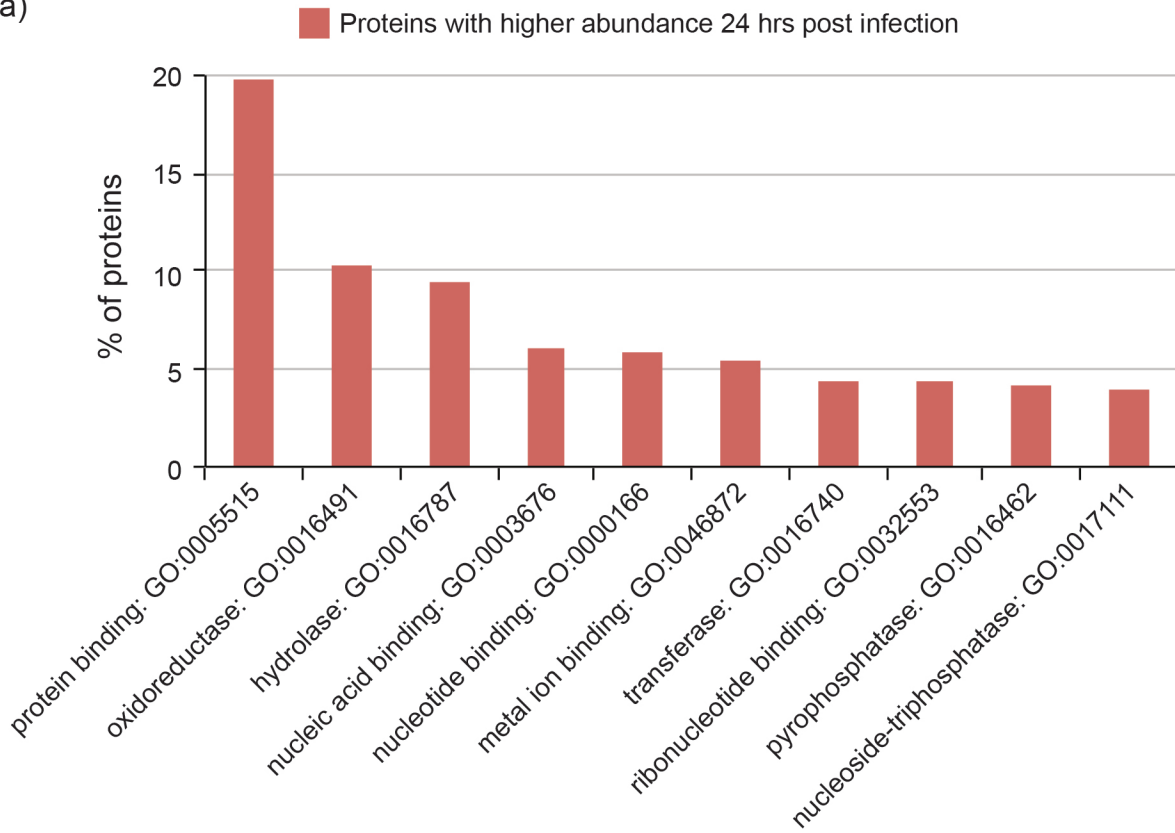

(b)

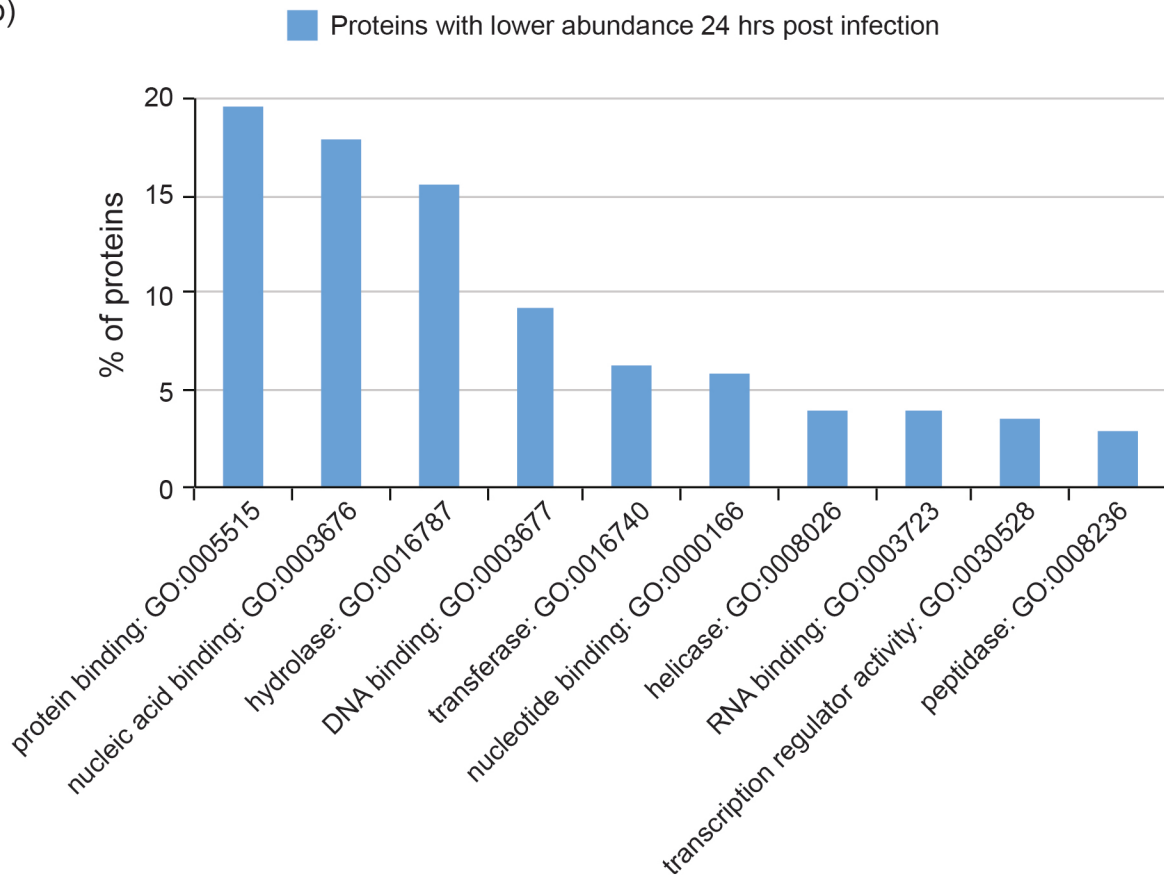

**Fig. S5 Gene Ontology (GO) term analysis for those proteins changing in abundance 24 hours post-infection.**

The percentage of proteins with a particular GO term, relative to the total number of proteins changing in abundance, is provided for those proteins that show increased abundance **(a)** and those that show decreased abundance **(b)** 24 hours post-infection. The top 10 most common GO terms are presented for each category.

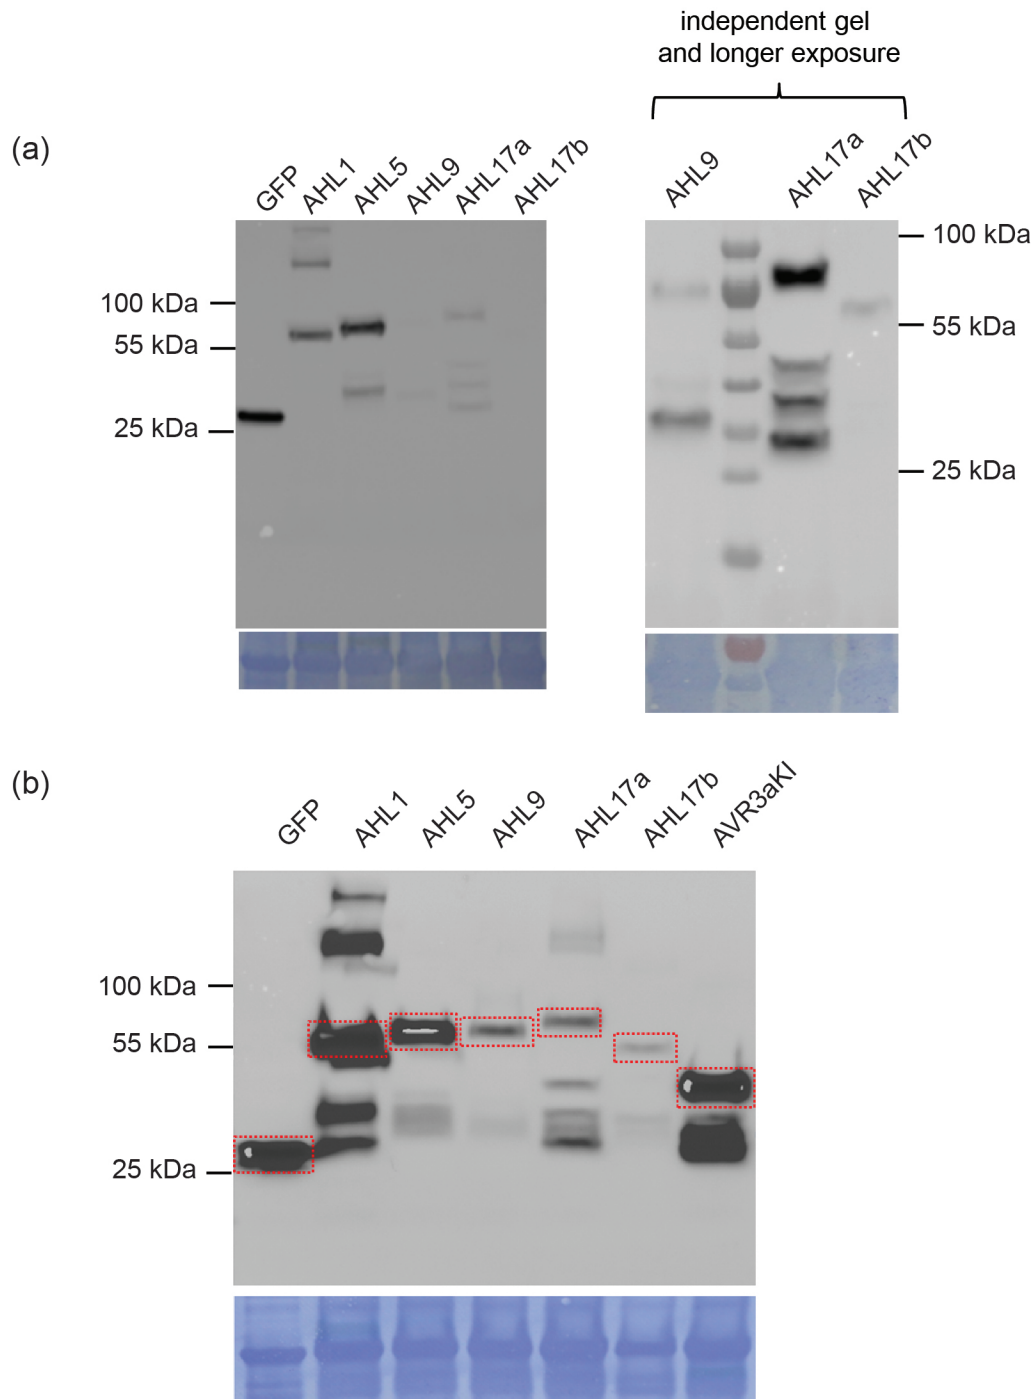

**Fig. S6 Verification of the expression and stability of EGFP fusion constructs used for confocal microscopy, *P. capsici* infection and PTI assays.**

*A. tumefaciens* AGL1 strains carrying EGFP-AHL fusions (vector pB7WGF2) were



infiltrated into *N. benthamiana* leaves at an OD600 of 0.1 (Panel A and B) or 0.05 (panel C). Samples were harvested 48 hours post-infiltration for protein extraction and western blotting with anti-EGFP antibody. **(A)** Western showing expression and stability of EGFP-AHL fusion proteins during localisation and *P. capsici* infection experiments. **(B)** Verification of EGFP-AHL protein expression and stability for PTI assays. Analyses of AHL9, AHL17a and AHL17b samples were repeated on a separate gel with longer exposure times to verify protein expression (right panel). **(C)** Detection of individual EGFP-AHL fusion proteins under conditions used for co-expression experiments (OD600 = 0.05). Loading was verified for each Western by means of Coomassie staining of each membrane.

CLUSTAL W (1.81) multiple sequence alignment

```

AHL1/1-318      MESREAIAPEAPSNYHM-----VSRTESTPIPP-----GT
AHL5/1-346      MDGREGMVLGGAAAYLNRGISGSGSGVGGGSGAPTRVTTTPPSYKLSLNPNISVQSNVGG
AHL9/1-339      MDRREAMMLPGSSPYMQRGMSCGSGS-----NAPGLQGSPSINPSLTPNNIAFQSS-GS
                *: **.: . : *::                :..                *

AHL1/1-318      LAVIPPPV-----ATAFPISSE--KKKRGRPRKYCPDGA-VARTISP
AHL5/1-346      GGTLSSTYQAVENPSPHFSHGINMSVVSSVSSGSDPVKKRGRPRKYCPDGSKMSLGLSP
AHL9/1-339      GASIPQTL--VMDPSSTLSPRGSIGASSAMPQG-EPVRRKRGRPRKYGAQGA-MSLALTP
                . : . .                :... . : ..*****.:* : : :**

AHL1/1-318      ---TPISADFL---SKKVSVARPESEKKARNKVAENLGEWISCSTGGNFLPHMITVEAG
AHL5/1-346      LSSTPSTGSIT--PGPKRAKGRPPGSGWKQK---LAPLGEWMNTSAGLAFTPHVINISVG
AHL9/1-339      ---PPSTQALS LNPTQKRGRGRPPGSRKQK---LTSFGGWLSNTAGIGFTPHVIMIAVG
                . * : :      * . ** .. . :      : * *.: : * * * : : *

AHL1/1-318      EDVTMKIISFSQQGPRAICII SAVGLISNVTLRQPNSSGGTLTYEGRFEILSLSGSFTPT
AHL5/1-346      EDVAAKLLAFAEQRPRALCVLSASGSLSAVTLRPPTSSGSTVTYEGRFEILCLSGSYLVA
AHL9/1-339      EDITTKIMSFQQGPRASICILSATGVISTVTLRQPSTSGGTVTYEGRFEILCLSGSFLVN
                **.: *::*: * **::*: * * : * **** *.:**.:*****.*****:

AHL1/1-318      EFGGSRTTSRTGGMSISLASPDGRVVGCTLAGLLIAASPVQVVVGSFLPSNYQEVKPKKQ
AHL5/1-346      ESGGPR--DRTGGISISVSSPDGHVLCGAVGGRLIATSPVQVVVCSFV---Y-GPKVKSK
AHL9/1-339      ESGGSR--GRIGSLSVSLASPDGRVIGGGVGGVLAASPIQVIVGSFL---CSSSKAKKR
                * **.* . * *.:*:*:***.*:** :.* *:*:*:*:* * ** :      * *..

AHL1/1-318      KAEKAITYGTLSPPAAPHSSNMEPRSSNAHTVNVPAAGTQNVISSSIQPNHWTAM-PSVQ
AHL5/1-346      -----PETSTKG---SEEESA EKPSIPIKATLSQDPTSNPATGVWPPIS
AHL9/1-339      -----AAESVQSACTSDLQTTDNSVNPADALSNQNLAPSSSMGVWPSSR
                . *      * : :. . . . . . . . : *

AHL1/1-318      DSRKSTTDINISLQGE
AHL5/1-346      RPELRNSQPEIDLTRG
AHL9/1-339      QIDLQGTGHIDIDLMRG
                . : *.*

```

**Fig. S7 ClustalW Alignment of AHL1, AHL5 and AHL9 amino acid sequences.**

Identical or conserved residues are marked by “\*” (asterisk) whereas “:” (colon) indicates strong conservation of amino acid properties between sequences. A “.” (period) indicates conservation on the basis of weakly similar amino acid properties.
